# Supplementary material for: Boron-doped TiO2 (B-TiO2): visible-light photocatalytic difunctionalization of alkenes and alkynes
Source: Royal Society of Chemistry journal article supplement (doi:10.1039/d1nj01752g), 2021-01-01
Supplement: d1nj01752g1.pdf [file d1nj01752g1.pdf]

## Supporting Information

### **Boron-Doped TiO<sub>2</sub> (B-TiO<sub>2</sub>): Visible-light Photocatalytic di-functionalization of alkenes and alkynes.**

Mona Hosseini-Sarvari,\* and Atefe Valikhani

Nano Photocatalysis Lab, Department of Chemistry, Faculty of Science, Shiraz University, Shiraz, 7194684795 I.R.

Iran E-mail: [hossaini@shirazu.ac.ir](mailto:hossaini@shirazu.ac.ir)

| Table of contents                                                                                      | Pages |
|--------------------------------------------------------------------------------------------------------|-------|
| General Information.....                                                                               | S1    |
| Preparation of TiO <sub>2</sub> nanoparticles.....                                                     | S2    |
| Preparation of B-TiO <sub>2</sub> NPs as photocatalyst.....                                            | S2    |
| General procedure for the synthesis of $\alpha$ -thiocyanato and $\alpha$ -isothiocyanato ketones..... | S2    |
| Characterization data for compounds .....                                                              | S2    |
| <sup>1</sup> H NMR, <sup>13</sup> C NMR and FT-IR spectra for all compounds:.....                      | S4    |
| References.....                                                                                        | S11   |

#### General Information

All of the chemical materials were prepared from Aldrich, Fluka, Acros and Merck. All solvents were procured from purified by usual standard procedures. Photoactivity of photocatalysts were characterized by UV-Vis spectrophotometer (Shimadzu UV-2450 spectrophotometer). Catalysts were investigated by power X-ray diffraction (XRD) on a Bruker D8, Advance, Bruker, axs) and IR spectra. The products of the reactions were followed by TLC using silica gel polygrams SIL G/UV 254 plates. All products were purified by column chromatography. Products were identified by <sup>1</sup>HNMR, <sup>13</sup>CNMR, FT-IR, CHNS and melting point subsequently.

IR spectra were prepared using a Shimadzu FT-IR 8300 spectrophotometer. Melting points were determined in open capillary tubes in a Büchi- 535 circulating oil melting point apparatus.

Elemental analyses were performed by Thermo Finnigan CHNS analyzer, 1112 series. X-ray diffraction (XRD, D8, Advance, Bruker, axs) were obtained for characterization of the heterogeneous catalyst. UV/Vis spectra were obtained with an Ultrospec 3000 UV/Visible spectrometer. NMR spectra were recorded on a Bruker Avance DPX-250 (<sup>1</sup>H-NMR 250, 400 MHz, and <sup>13</sup>C NMR 62.9, 100 MHz) spectrometer in pure deuterated solvents with tetramethylsilane as an internal standard. Scanning electron micrographs were obtained by SEM instrumentation (SEM, XL-30 FEG SEM, and Philips, at 20 KV). TEM analyses were carried out using a JEOL-1200 microscope, operated at 200 kV.

#### Preparation of B-TiO<sub>2</sub>NPs as photocatalyst

First, 0.0025 mol of boric acid were dissolved in 45 mL of ethanol/ water (8:1) mixture. Subsequently, 0.025 mol of titanium (IV) butoxide Ti (OBu)<sub>4</sub> (molar ratio B/Ti = 1:10), was added dropwise at 0 °C under stirring. To ensure a complete hydrolysis of Ti(OBu)<sub>4</sub>, the solution mixture was continuously stirred for about 10 h at room temperature (22 °C). After being aged for an additional 24 h, the mixture was centrifuged, dried under vacuum, and then calcined in air at 400 °C for 5 h to obtain the B-TiO<sub>2</sub>NPs sample<sup>1</sup>.

#### General procedure for the synthesis of α-thiocyanato and α-isothiocyanato ketones

To a mixture of double or triple bond compounds (0.5 mmol), ammonium thiocyanate (0.5 mmol) in CH<sub>3</sub>CN (1.5 ml) and B-TiO<sub>2</sub> (0.007 g) as catalyst was added and the mixture was irradiated by blue LED in to ice/water (0 °C) bath. The progress of the reaction was monitored by TLC. After completion of the reaction and separation of catalyst by centrifuge, the solvent was removed, and then 20 mL H<sub>2</sub>O was added and the mixture was extracted with EtOAc. The organic layer was washed with water (3×10 mL) and dried over anhydrous Na<sub>2</sub>SO<sub>4</sub>. The organic layer was concentrated under vacuum. The resulting crude product was purified by chromatography ethyl acetate/petroleum ether (1:100) to give the desired thiocyanation products in good isolated yields.

#### Characterization data for compounds

*1-Phenyl-2-thiocyanatoethan-1-one (3a)*. Yellow oil<sup>2</sup>; FT-IR (KBr cm<sup>-1</sup>): 2152 (CN), 1681 (C=O); <sup>1</sup>H NMR (400 MHz, CDCl<sub>3</sub>): δ (ppm) 4.67 (s, 2H, CH<sub>2</sub>), 7.46 (t, 2H, *J* = 8.0 Hz, ArH), 7.60 (t, 1H, *J* = 8.0 Hz, ArH), 7.87 (d, 2H, *J* = 8.0 Hz, ArH); <sup>13</sup>C NMR (100 MHz, CDCl<sub>3</sub>): δ (ppm) 43.04 (CH<sub>2</sub>), 111.8 (SCN), 128.4, 129.1, 133.9, 134.8, 190.8 (C=O). Anal. Calcd. for C<sub>9</sub>H<sub>7</sub>NOS: C, 61.00; H, 3.98; N, 7.90; Found: C, 60.93; H, 3.82; N, 7.81.

*1-(4-Chlorophenyl)-2-thiocyanatoethan-1-one (3b)*. Colorless crystal<sup>3</sup>, mp: 130-132 °C (Colorless crystal, mp: 132-135 °C [Nair *et al.*, 2000]); FT-IR (KBr cm<sup>-1</sup>): 2157 (CN), 1671 (C=O); <sup>1</sup>H NMR (400 MHz, CDCl<sub>3</sub>): δ (ppm) 4.63 (s, 2H, CH<sub>2</sub>), 7.43 (d, 2H, *J* = 12.0 Hz, ArH), 7.81 (d, 2H, *J* = 8.0 Hz, ArH); <sup>13</sup>C NMR (100 MHz, CDCl<sub>3</sub>): δ (ppm) 42.6 (CH<sub>2</sub>), 111.5 (SCN), 129.5, 129.8, 131.3, 141.5, 189.69 (C=O). Anal. Calcd. for C<sub>9</sub>H<sub>6</sub>ClNOS: C, 51.07; H, 2.86; N, 6.62;

Found: C, 50.93; H, 2.70; N, 6.57.

*1-(4-Fluorophenyl)-2-thiocyanatoethan-1-one (3c)*. Colorless liquid; FT-IR (KBr  $\text{cm}^{-1}$ ): 2156 (CN), 1676 (C=O);  $^1\text{H}$  NMR (400 MHz,  $\text{CDCl}_3$ ):  $\delta$  (ppm) 4.73 (s, 2H,  $\text{CH}_2$ ), 7.20-7.25 (m, 2H, ArH), 7.99-8.02 (m, 2H, ArH);  $^{13}\text{C}$  NMR (100 MHz,  $\text{CDCl}_3$ ):  $\delta$  (ppm) 42.7 ( $\text{CH}_2$ ), 111.7 (SCN), 116.5 ( $J= 22.0$  Hz,  $\text{C}_{\text{Ar}}$ ), 131.2 ( $J= 22.0$  Hz,  $\text{C}_{\text{Ar}}$ ), 131.3 ( $J= 9.0$  Hz,  $\text{C}_{\text{Ar}}$ ), 165.3, 167.9, 189.3 (C=O). Anal. Calcd. for  $\text{C}_9\text{H}_6\text{FNOS}$ : C, 55.38; H, 3.10; N, 7.18; Found: C, 55.17; H, 3.01; N, 7.10.

*1, 2-Diphenyl-2-thiocyanatoethan-1-one (3d)*. Colorless liquid; FT-IR (KBr  $\text{cm}^{-1}$ ): 2383 (CN), 1686 (C=O);  $^1\text{H}$  NMR (400 MHz,  $\text{CDCl}_3$ ):  $\delta$  (ppm) 7.33-7.39 (m, 2H, ArH and CH), 7.49-7.52 (m, 1H, ArH), 7.54-7.56 (m, 3H, ArH), 7.67-7.69 (m, 1H, ArH), 7.72-7.74 (m, 2H, ArH), 7.99-8.02 (m, 2H, ArH);  $^{13}\text{C}$  NMR (100 MHz,  $\text{CDCl}_3$ ):  $\delta$  (ppm) 68.1 (CH), 125.5 (SCN), 128.5, 128.8, 129.0, 129.9, 130.8, 132.4, 132.9, 134.8, 194.5 (C=O). Anal. Calcd. for  $\text{C}_{15}\text{H}_{11}\text{NOS}$ : C, 71.12; H, 4.38; N, 5.53; Found: C, 70.75; H, 4.13; N, 5.43.

*2-Phenyl-1-thiocyanatopropan-2-ol (3e)*. White solid, mp: 122-124 °C (White solid, mp: 122-124 °C); FT-IR (KBr  $\text{cm}^{-1}$ ): 3460 (OH);  $^1\text{H}$  NMR (400 MHz,  $\text{CDCl}_3$ ):  $\delta$  (ppm) 1.18 (s, 3H,  $\text{CH}_3$ ), 3.57-3.76 (m, 2H,  $\text{CH}_2$ ), 5.52 (s, 1H, OH), 7.2-7.34 (m, 5H, ArH);  $^{13}\text{C}$  NMR (100 MHz,  $\text{CDCl}_3$ ):  $\delta$  (ppm) 27.46 ( $\text{CH}_3$ ), 42.54 ( $\text{CH}_2$ ), 71.14 ( $\text{C}_{\text{tert}}$ ), 113.93 (SCN), 124.26, 125.07, 127.1, 151.67. Anal. Calcd. for  $\text{C}_{10}\text{H}_{11}\text{NOS}$ : C, 62.15; H, 5.74; N, 7.25; Found: C, 61.76; H, 5.33; N, 7.01.

*2-Thiocyanato-1-(p-tolyl)ethan-1-one (3f)*: Colorless crystalline<sup>3</sup>, mp: 106-108 °C (Colorless crystalline, mp: 105-107 °C); FT-IR (KBr  $\text{cm}^{-1}$ ): 2157 (CN), 1666 (C=O);  $^1\text{H}$  NMR (400 MHz,  $\text{CDCl}_3$ ):  $\delta$  (ppm) 2.38 (s, 3H,  $\text{CH}_3$ ), 4.63 (s, 2H,  $\text{CH}_2$ ), 7.25 (d, 2H,  $J= 8.0$  Hz, ArH), 7.77 (d, 2H,  $J= 8.0$  Hz, ArH);  $^{13}\text{C}$  NMR (100 MHz,  $\text{CDCl}_3$ ):  $\delta$  (ppm) 21.87 ( $\text{CH}_3$ ), 43.12 ( $\text{CH}_2$ ), 111.56 (SCN), 128.59, 129.87, 131.49, 145.72, 190.13 (C=O). Anal. Calcd. for  $\text{C}_{10}\text{H}_9\text{NOS}$ : C, 62.80; H, 4.74; N, 7.32; Found: C, 62.66; H, 4.61; N, 7.20.

*2-Isothiocyanato-1-phenylethan-1-one (4a)*. Colorless liquid; FT-IR (KBr  $\text{cm}^{-1}$ ): 2054 (N=C=S), 1678 (C=O);  $^1\text{H}$  NMR (400 MHz,  $\text{CDCl}_3$ ):  $\delta$  (ppm) 3.41 (s, 2H,  $\text{CH}_2$ ), 7.42 (t, 2H,  $J= 5.0$  Hz, ArH), 7.51 (t, 1H,  $J= 5.0$  Hz, ArH), 7.98 (d, 2H,  $J= 5.0$  Hz, ArH);  $^{13}\text{C}$  NMR (100 MHz,  $\text{CDCl}_3$ ):  $\delta$  (ppm) 32.5 ( $\text{CH}_2$ ), 128.1, 128.2 (NCS), 128.6, 133.1, 136.7, 198.7 (C=O). Anal. Calcd. for  $\text{C}_7\text{H}_9\text{NOS}$ : C, 61.00; H, 3.98; N, 7.90; Found: C, 59.88; H, 3.83; N, 7.86.

<sup>1</sup>H NMR, <sup>13</sup>C NMR and FT- IR spectra for all compounds:

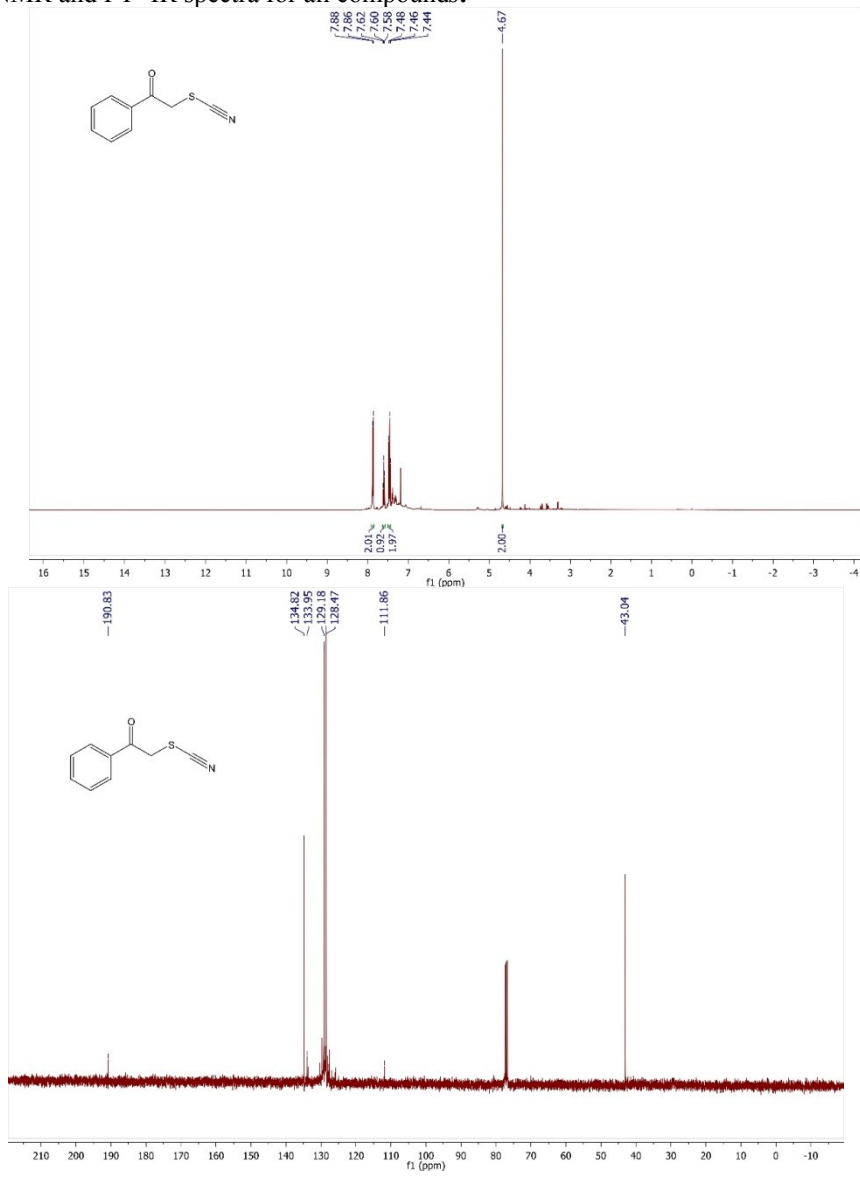

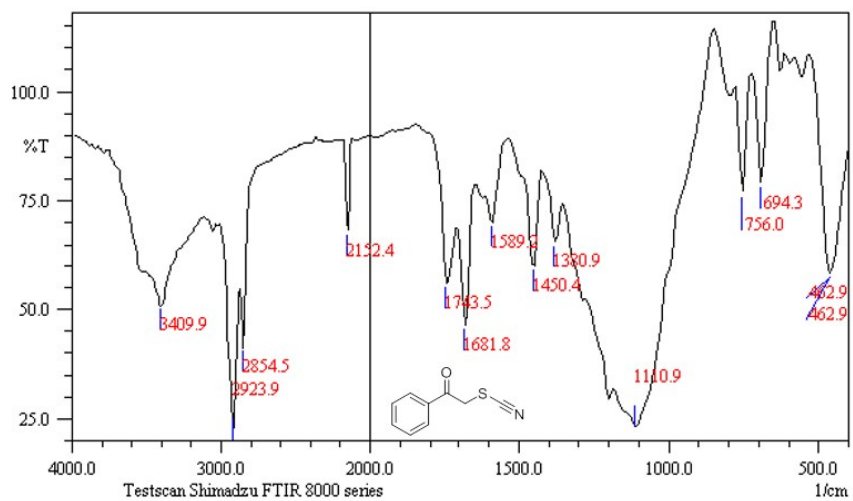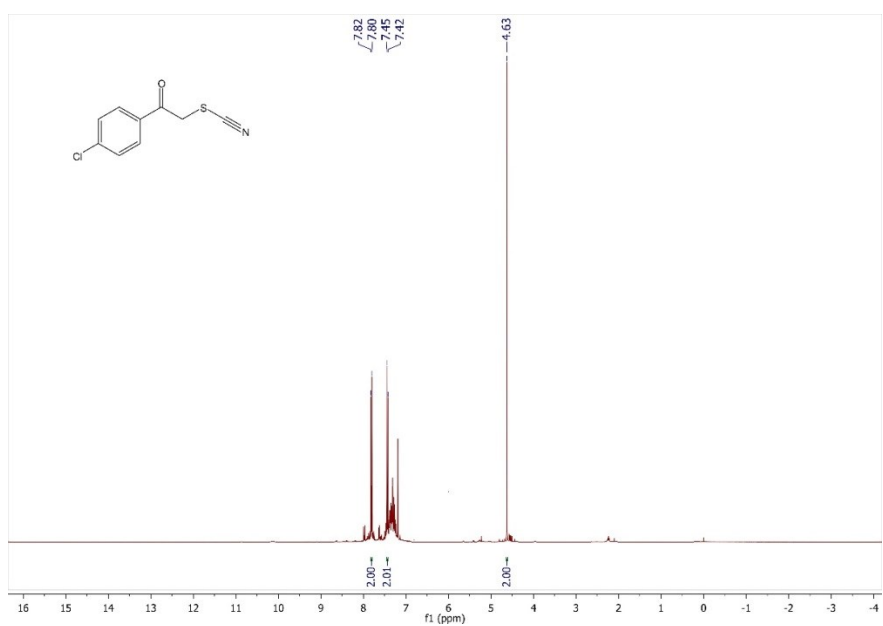

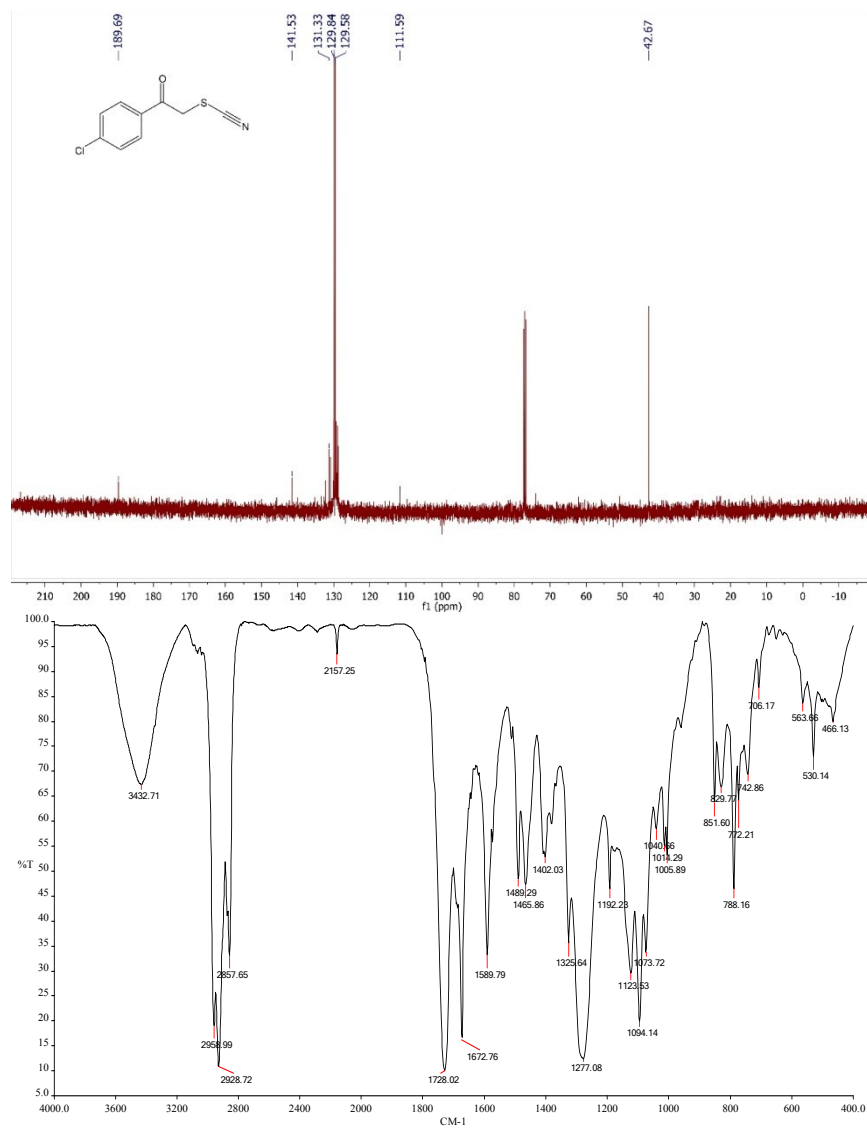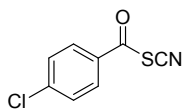

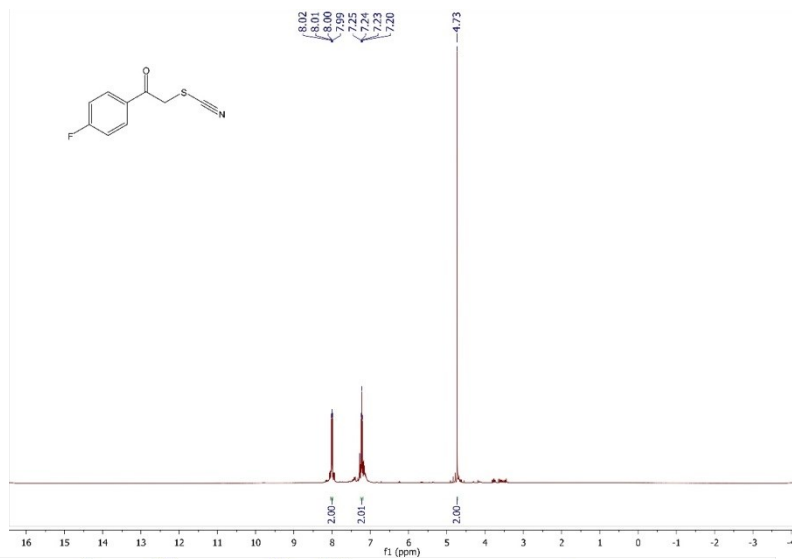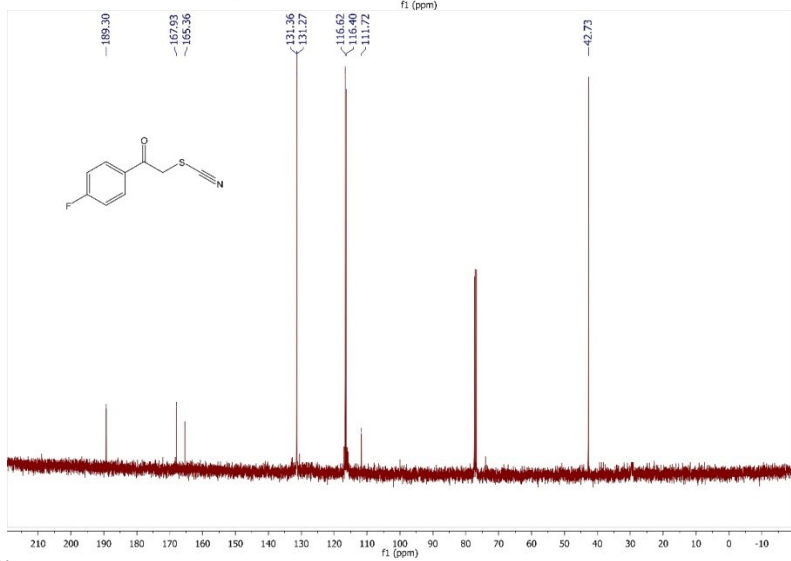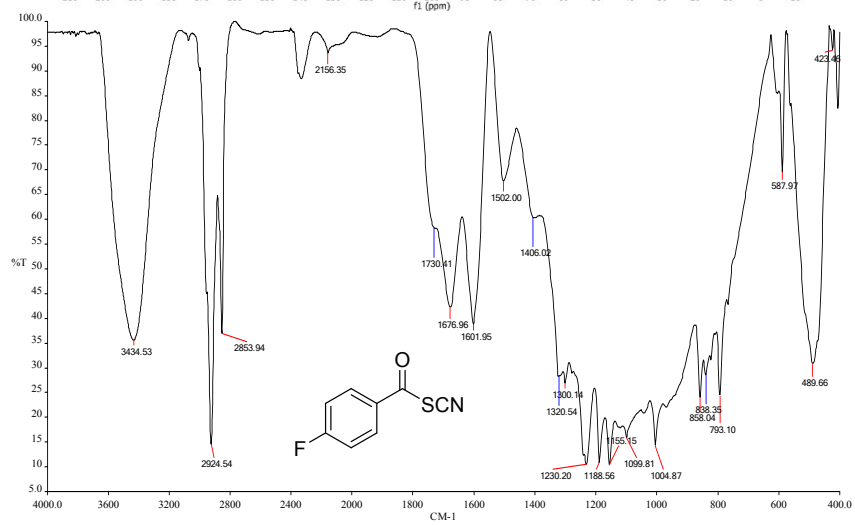

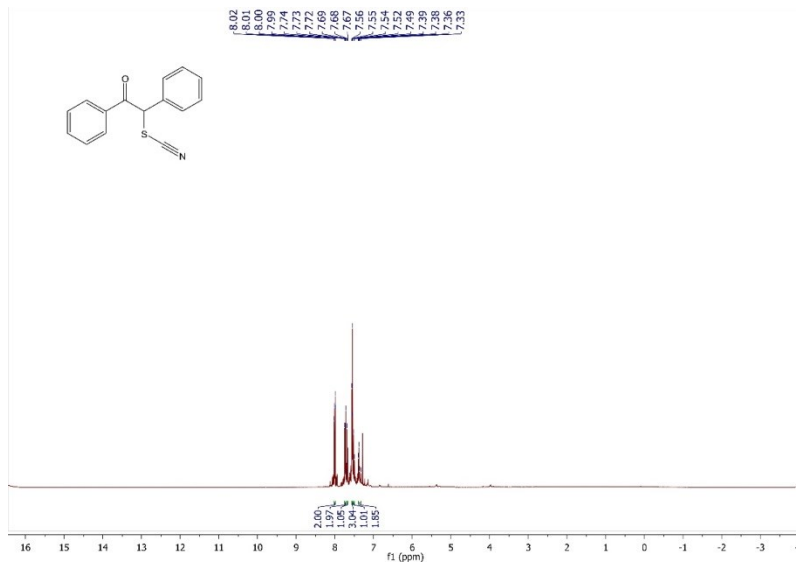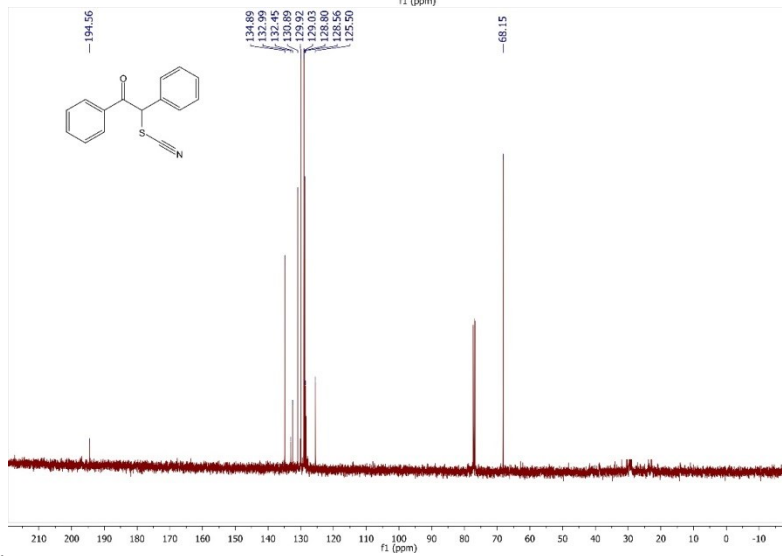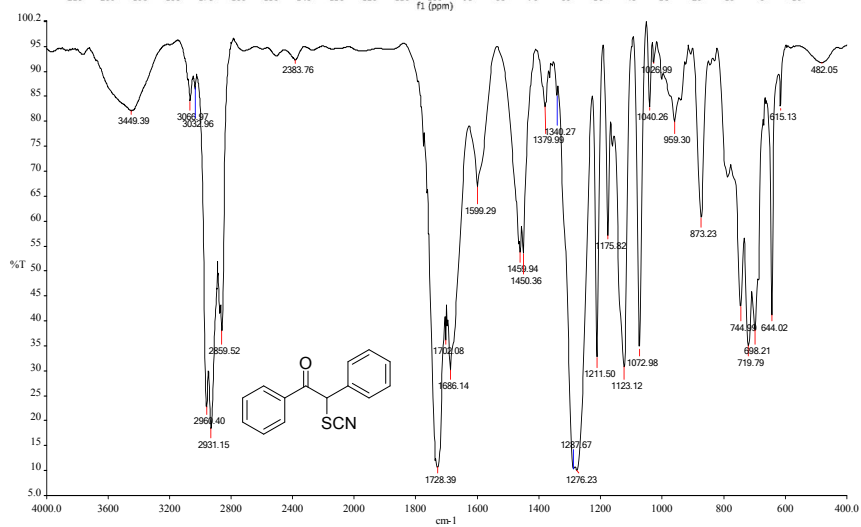



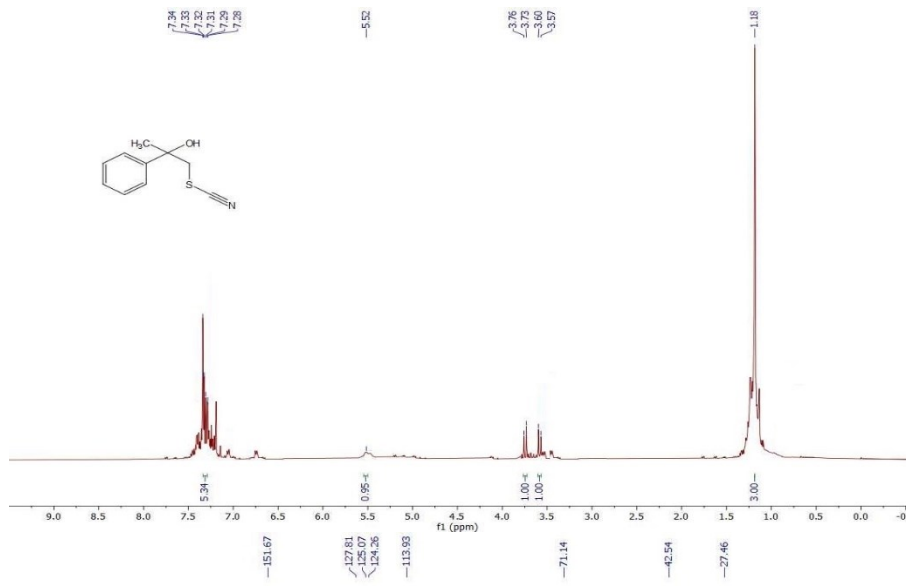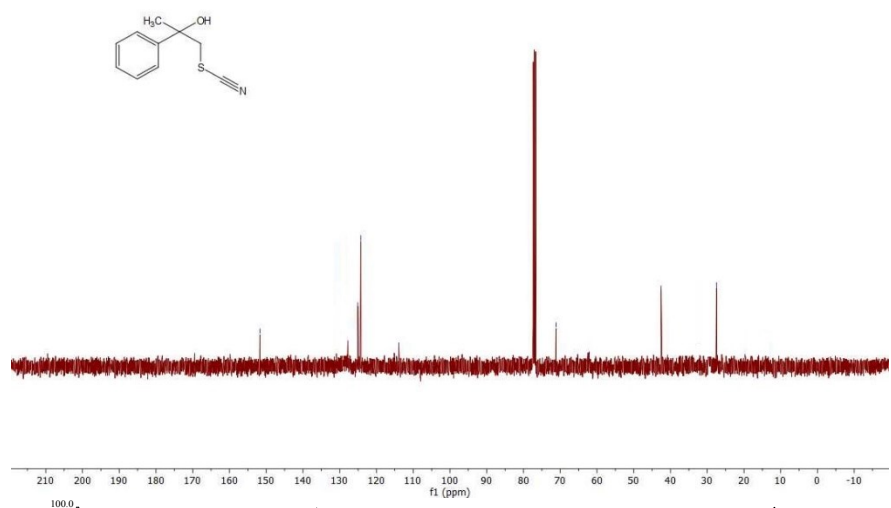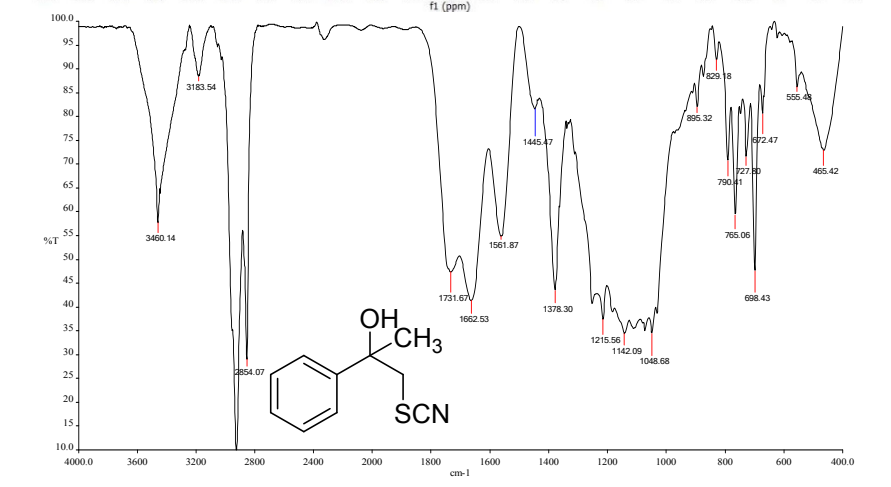

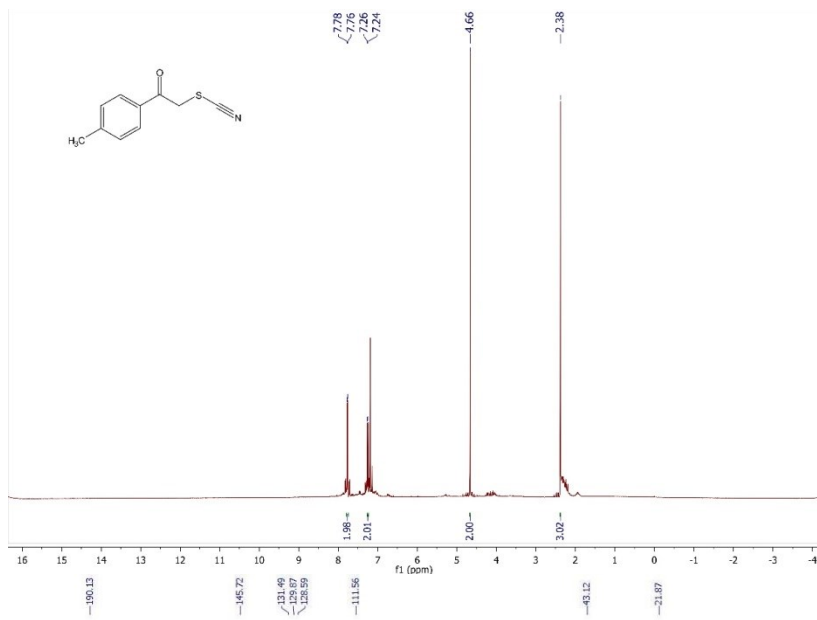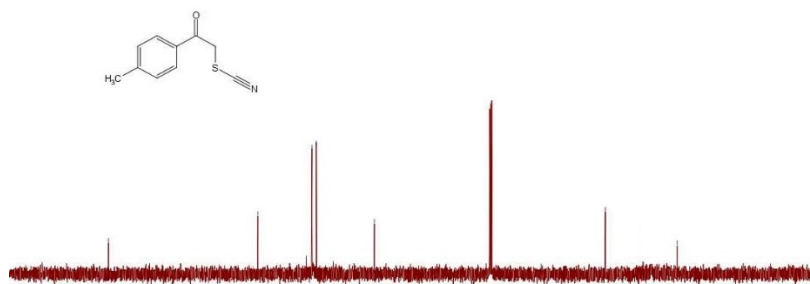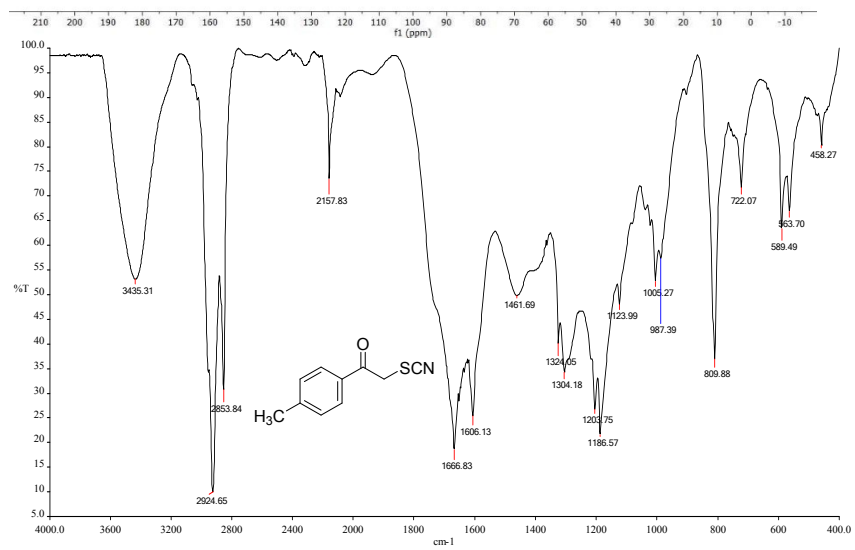

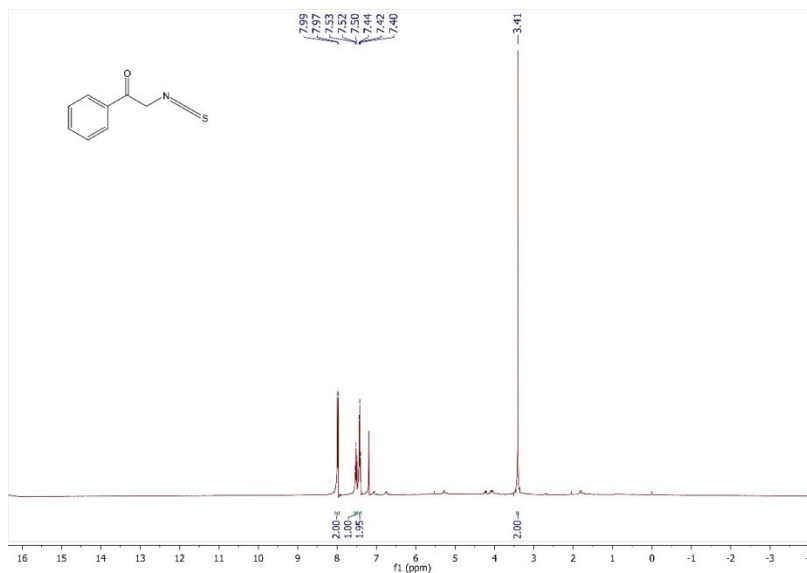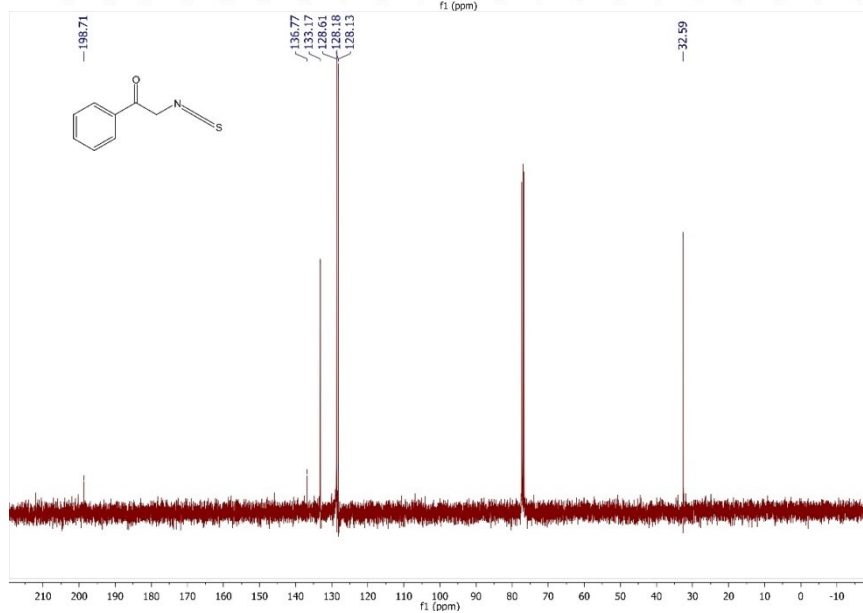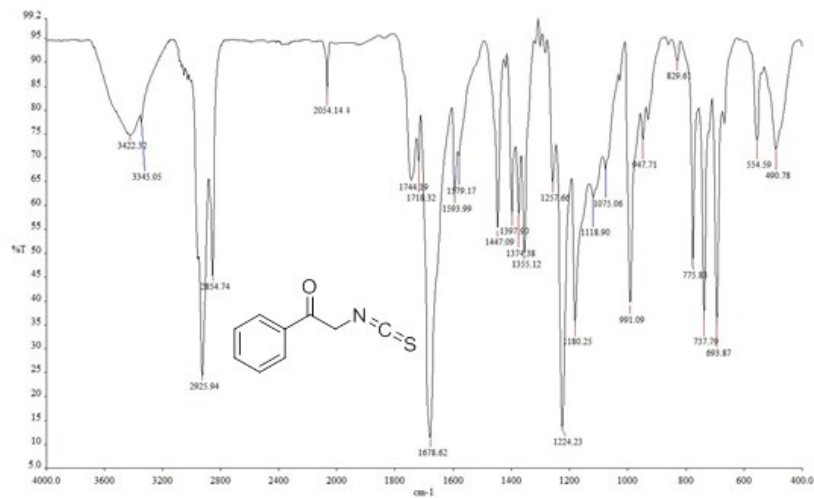

## Reference

- 1 N. Patel, A. Dashora, R. Jaiswal, R. Fernandes, M. Yadav, D. C. Kothari, B. L. Ahuja and A. Miotello, *J. Phys. Chem. C*, 2015, **119**, 18581–18590.
- 2 S. Liang, C.C. Zeng, H.Y. Tian, B.G. Sun, X.G. Luo, F.Z. Ren, *Adv. Synth. Catal*, 2018, **360**, 1444-1452.
- 3 V. Nair, L. G. Nair, T. G. George and A. Augustine, *Tetrahedron*, 2000, **56**, 7607–7611.
